# Supplementary material
Source: PubMed Central journal article supplement (PMC5841868)
Supplement: jciinsight-2-94298-s001.pdf [file jciinsight-2-94298-s001.pdf]

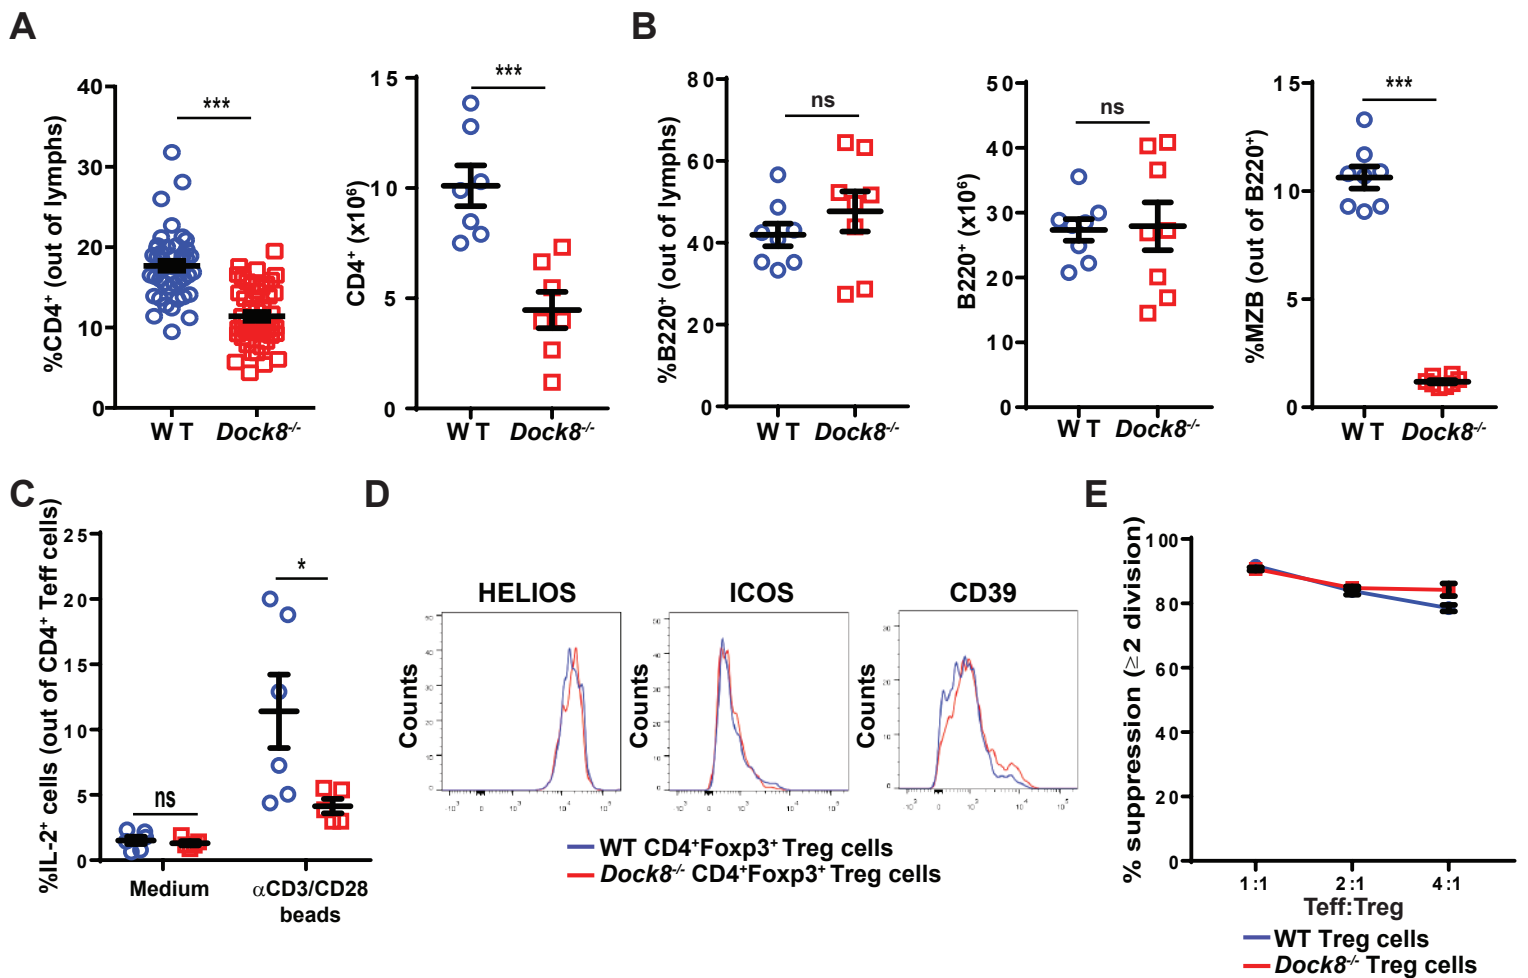

**Supplementary Figure 1. Decreased CD4<sup>+</sup> T cells and marginal zone B cells in *Dock8*<sup>-/-</sup> mice.** **A.** Percentage (left, n=26 mice per group) and total number of CD4<sup>+</sup> cells (right, n=7 mice per group) in the spleens of *Dock8*<sup>-/-</sup> mice and WT controls. **B.** Percentage and total number of B220<sup>+</sup> cells and percentage of marginal zone B (MZB) cells in the spleens of *Dock8*<sup>-/-</sup> mice and WT controls. n=8 mice from each group. **C.** CD4<sup>+</sup>CD25<sup>-</sup> Teff cells were isolated from the spleens of *Dock8*<sup>-/-</sup> and WT mice and cultured with anti-CD3+anti-CD28 coated beads. After 2 days in culture, Golgistop and Golgiplug were added to cultures for an additional 16 h. Intracellular staining for IL-2 was then performed. **D.** Expression of HELIOS, ICOS, and CD39 on/in splenic CD4<sup>+</sup>Foxp3<sup>+</sup> cells from *Dock8*<sup>-/-</sup> mice and WT controls. Representative histograms are shown. **E.** Suppression of the proliferation of Cell Trace Violet loaded CD4<sup>+</sup>CD25<sup>-</sup> Teff cells by IL-2 preactivated CD4<sup>+</sup>CD25<sup>+</sup>CD39<sup>+</sup> Treg cells from *Dock8*<sup>-/-</sup> mice and WT controls. Teff proliferation was measured by FACS analysis of Cell Trace Violet dilution. Results in C and E are representative of 2 independent experiments. Symbols represent individual mice (A-C) and bars in A-C and E represent mean and SEM. t-test ns p>0.05, \* p<0.05, and \*\*\* p<0.001.

**A**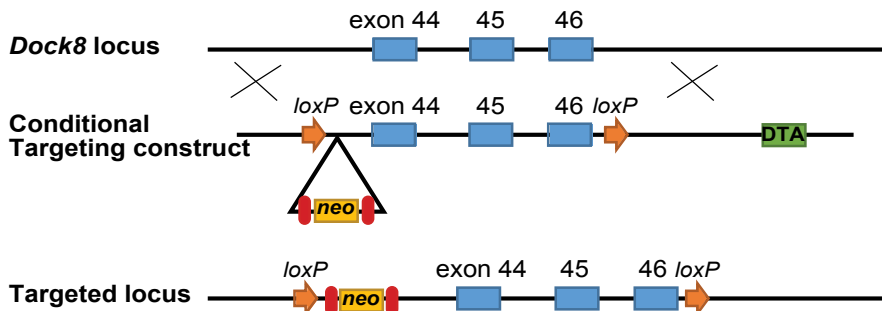**B**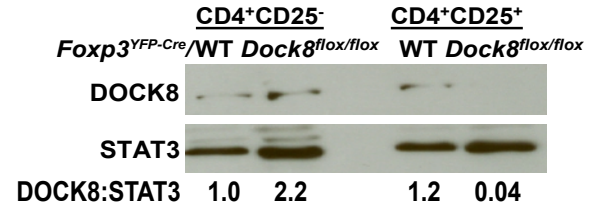**C**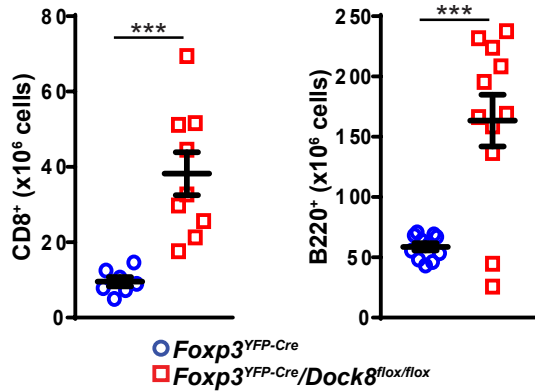**D**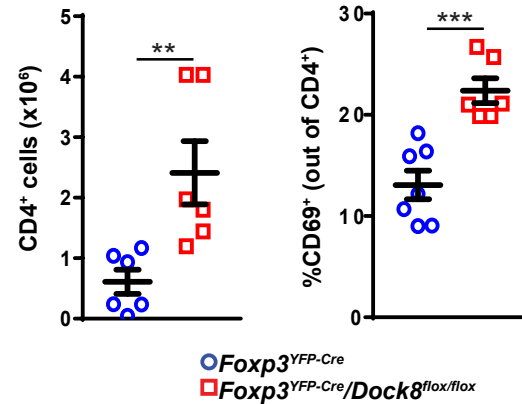

**Supplementary Figure 2. Strategy for the generation of *Dock8*<sup>flox/flox</sup> mice.** **A.** Schematic of the targeted locus and targeting vector used to generate *Dock8*<sup>flox/flox</sup> mice. Small red boxes indicate *Flp* sequences flanking the *neo* gene. Green box indicates *Diphtheria Toxin A* gene. Orange arrows are *loxP* sites. **B.** DOCK8 expression by purified CD4<sup>+</sup>CD25<sup>-</sup> (Teff) and CD4<sup>+</sup>CD25<sup>+</sup> (Treg) cells isolated from spleens of *Foxp3*<sup>YFP-Cre</sup>/*Dock8*<sup>flox/flox</sup> mice and *Foxp3*<sup>YFP-Cre</sup> controls isolated using magnetic beads. Lysates were immunoblotted for DOCK8 and STAT3 as loading control. Densitometry was performed and the relative ratio of DOCK8:STAT3 protein is noted below each lane. **C.** Number of CD8<sup>+</sup> T cells (left) and B cells (right) in the spleens of *Foxp3*<sup>YFP-Cre</sup>/*Dock8*<sup>flox/flox</sup> mice and *Foxp3*<sup>YFP-Cre</sup> controls. **D.** CD4<sup>+</sup> cell counts and percentage of CD69<sup>+</sup> cells among CD4<sup>+</sup> T cells in the peripheral LNs from 30 week-old *Foxp3*<sup>YFP-Cre</sup>/*Dock8*<sup>flox/flox</sup> mice and *Foxp3*<sup>YFP-Cre</sup> controls. Symbols represent individual mice and bars in C and D represent mean and SEM. t-test \*\* p<0.01, \*\*\* p<0.001

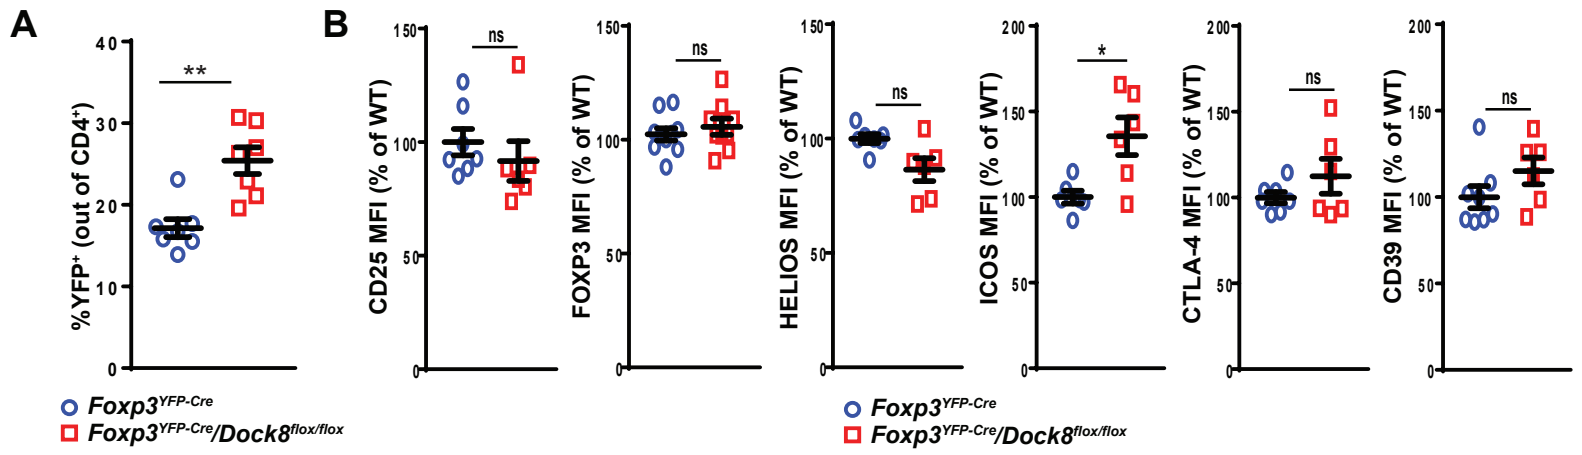

**Supplementary Figure 3. Increased Treg cells in the LNs and normal or elevated expression of Treg cell markers on the Treg cells from *Foxp3*<sup>YFP-Cre</sup>/*Dock8*<sup>flox/flox</sup> mice.** **A.** Percentage of YFP<sup>+</sup> Treg cells out of CD4<sup>+</sup> T cells among total Treg cells in peripheral LNs of 30 week-old *Foxp3*<sup>YFP-Cre</sup>/*Dock8*<sup>flox/flox</sup> mice and *Foxp3*<sup>YFP-Cre</sup> controls. **B.** Quantitative analysis of surface CD25 and CD39 and total FOXP3, HELIOS, ICOS, and CTLA-4 expression in splenic CD4<sup>+</sup>YFP<sup>+</sup> cells from *Foxp3*<sup>YFP-Cre</sup>/*Dock8*<sup>flox/flox</sup> mice and *Foxp3*<sup>YFP-Cre</sup> controls (right). Symbols represent individual mice and bars represent mean and SEM. t-test ns p>0.05, \* p<0.05, \*\* p<0.01

**A**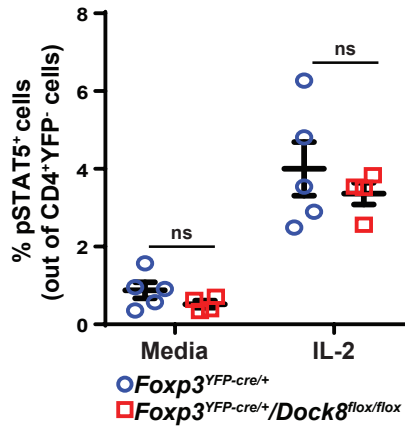**B**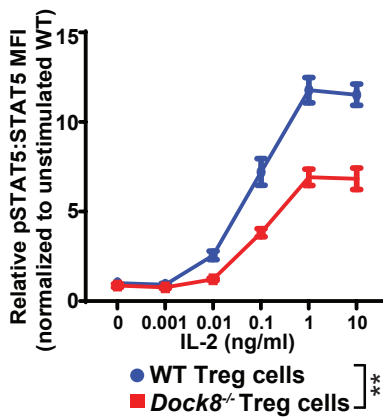**C**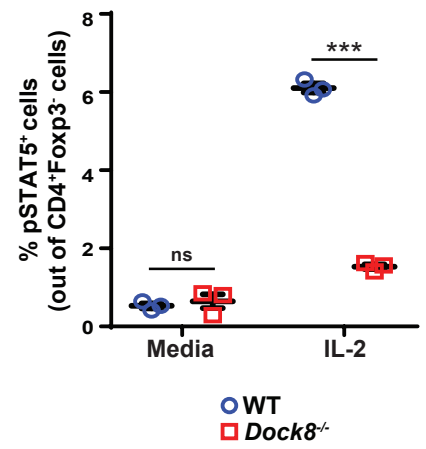

**Supplementary Figure 4. CD4<sup>+</sup> T cells from *Dock8<sup>-/-</sup>* mice had a modest impairment in IL-2-driven STAT5 phosphorylation.** **A.** Percentage of pSTAT5<sup>+</sup> cells in splenic CD4<sup>+</sup>CD25<sup>-</sup>YFP<sup>-</sup> Teff cells from *Foxp3<sup>YFP-Cre</sup>/Dock8<sup>flox/flox</sup>* mice and *Foxp3<sup>YFP-Cre</sup>* controls at baseline and after stimulation for 15 min with 10 ng/ml of mouse IL-2. **B.** Relative pSTAT5 content in CD4<sup>+</sup>FOXP3<sup>+</sup> Treg cells from *Dock8<sup>-/-</sup>* mice and WT controls at baseline and following stimulation with increasing concentrations of IL-2 for 15 minutes. The graph plots the relative pSTAT5:STAT5 MFI ratio normalized to the WT baseline ratio. **C.** Splenic CD4<sup>+</sup>CD25<sup>-</sup> Teff cells from *Dock8<sup>-/-</sup>* and WT control mice at baseline and after stimulation for 15 min with 10 ng/ml of mouse IL-2. Results in A-C are representative of 3 independent experiments. Bars represent mean and SEM. Significance was determined by unpaired t-test in A and C, while ANOVA was used to compare the curves in B. ns p>0.05, \*\* p<0.01, \*\*\* p<0.001

**A**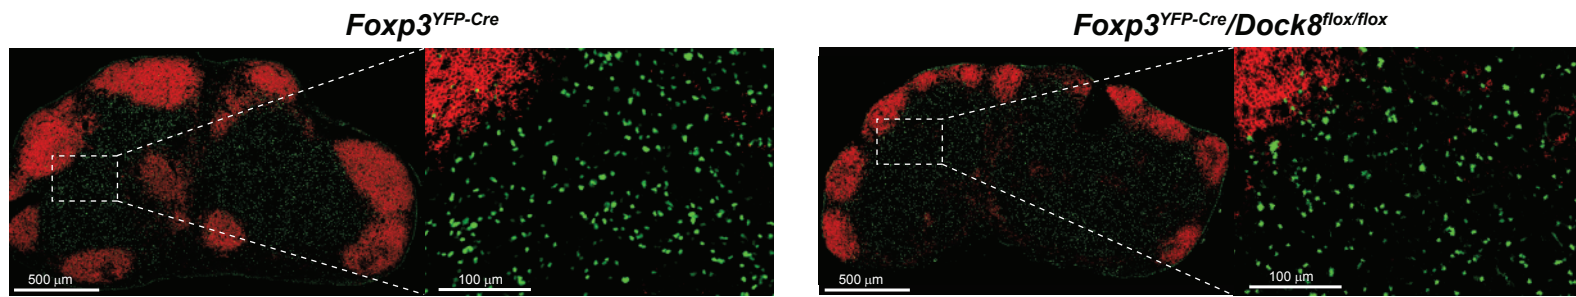**B**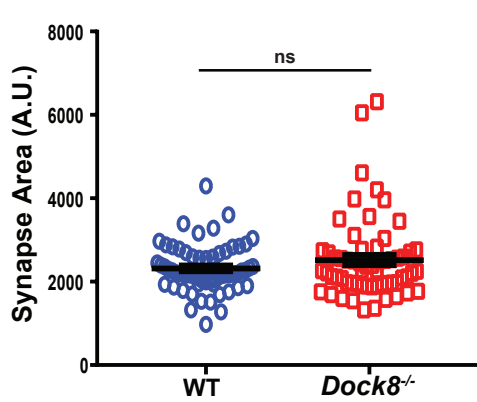**C**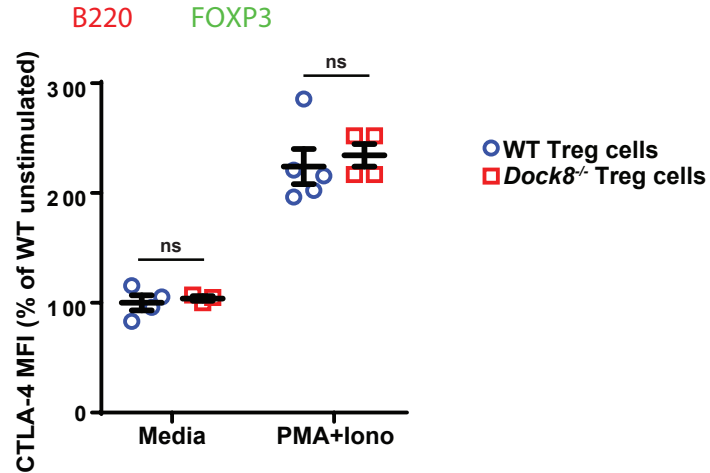

**Supplementary Figure 5. DOCK8 deficient Treg cells migrate normally to the T cell zones and are able to upregulate surface expression of CTLA-4.** **A.** Representative immunofluorescent staining of peripheral LN sections from a 4 week old *Foxp3*<sup>YFP-Cre</sup>/*Dock8*<sup>flox/flox</sup> mouse and a *Foxp3*<sup>YFP-Cre</sup> control. FOXP3<sup>+</sup> cells are shown in green, and B220<sup>+</sup> cells are red. Images are representative of three independent experiments using one mouse per group. **B.** Treg cells from *Dock8*<sup>-/-</sup> and WT control mice were plated on anti-CD3 and ICAM-1 coated glass chambers. After 5 min, the relative area of the immune synapse was measured. **C.** Surface expression of CTLA-4 on *Dock8*<sup>-/-</sup> and WT Treg cells before and after stimulation with PMA and ionomycin for 3 hours. Experiments B and C are representative of 2 independent experiments. Symbols represent individual measurements in B and individual mice in C. Bars in B and C represent mean and SEM. t-test ns p>0.05

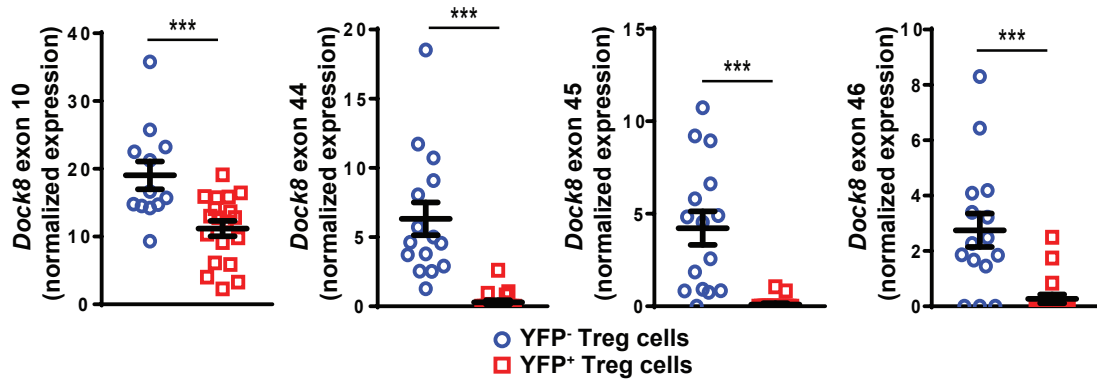

**Supplementary Figure 6. YFP<sup>+</sup> Treg cells from *Foxp3*<sup>YFP-Cre/+</sup>/*Dock8*<sup>flox/flox</sup> female mice have markedly decreased expression of *Dock8* exons 44-46.** CD4<sup>+</sup>CD25<sup>+</sup>CD39<sup>+</sup>YFP<sup>+</sup> (DOCK8 deficient) and YFP<sup>-</sup> (DOCK8 sufficient) Treg cells were sorted from *Foxp3*<sup>YFP-Cre/+</sup>/*Dock8*<sup>flox/flox</sup> female mice. mRNA expression of *Dock8* exons 10 and 44-46 are shown. Symbols represent independent samples and bars represent mean and SEM. t-test \*\*\* p<0.001
